# Supplementary material for: Reduced lattice thermal conductivity and strong four-phonon scattering in h -B 12 assembled from boron clusters on a honeycomb lattice
Source: Royal Society of Chemistry journal article supplement (doi:10.1039/d4tc04690k), 2025-01-01
Supplement: d4tc04690k1.pdf [file d4tc04690k1.pdf]

## Supplementary Information

# Reduced lattice thermal conductivity and strong four-phonon scattering in *h*-B<sub>12</sub> assembled by boron clusters on a honeycomb lattice

*Ting Zhang*<sup>a</sup>, *Yu-Run Yang*<sup>a</sup>, *Xu Liu*<sup>a</sup>, *Jing Wang*<sup>\*a</sup>, *Zhao Liu*<sup>\*ab</sup>, and *Ying Liu*<sup>ac</sup>

<sup>a</sup> Department of Physics and Hebei Advanced Thin Film Laboratory, Hebei Normal University, Shijiazhuang, 050024, China

<sup>b</sup> Beijing Computational Science Research Center, Beijing, 100193, China

<sup>c</sup> National Key Laboratory for Materials Simulation and Design, Beijing, 100083, China

\* Corresponding author: [zliu@hebtu.edu.cn](mailto:zliu@hebtu.edu.cn) and [jwang@hebtu.edu.cn](mailto:jwang@hebtu.edu.cn)

## SI. Convergence calculations of $\kappa_{\text{lat}}$ about $\mathbf{q}$ -points.

We can see that the  $\kappa_{\text{lat}}$  of 2D  $h$ -B<sub>12</sub> is converged to within 5% for an increase in  $\mathbf{q}$ -points beyond  $90 \times 90 \times 1$  when considering only 3ph scattering. Additionally, it is converged to within 5% for an increase in  $\mathbf{q}$ -points beyond  $22 \times 22 \times 1$  when considering both 3ph and 4ph scatterings.

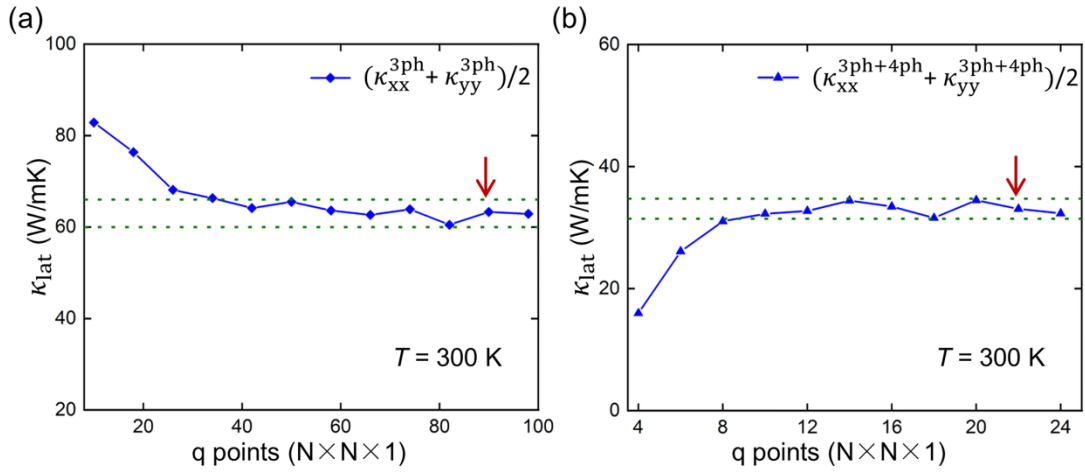

**Fig. S1** Variation of  $\kappa_{\text{lat}}$  with different  $\mathbf{q}$ -points for 2D  $h$ -B<sub>12</sub>, considering (a) only 3ph scattering and (b) both 3ph and 4ph scattering processes. The red arrow indicates the selected  $\mathbf{q}$ -points, and the green dashed line represents a fluctuation of  $\pm 5\%$  around the converged value.

## **S2. Basic information on the three structures assembled from icosahedral B<sub>12</sub> clusters.**

Figure S2(a) displays the optimized 2D honeycomb structure of *h*-B<sub>12</sub>, the triangular structure of *t*-B<sub>12</sub>, and the kagome structure of *k*-B<sub>12</sub> from left to right. All three structures are assembled from the icosahedral B<sub>12</sub> clusters as the basic building unit. Table S1 lists the space group, lattice constants, atomic layer thickness, and the B-B bonding lengths for adjacent clusters after comprehensive optimization for *h*-B<sub>12</sub>, *t*-B<sub>12</sub>, and *k*-B<sub>12</sub>. Figure S2(b) shows the phonon dispersions of the three structures in Fig. S2(a). We found that only *h*-B<sub>12</sub> has no imaginary frequencies, proving its stability. Figure S2(c) displays the band structures of three structures in Fig. S2(a) calculated using the PBE0 functional, revealing that the honeycomb *h*-B<sub>12</sub> is an indirect bandgap semiconductor ( $\Delta = 1.07$  eV), while the triangular *t*-B<sub>12</sub> and kagome *k*-B<sub>12</sub> are metallic. Therefore, the main carriers of thermal transport in *h*-B<sub>12</sub> are phonons. Notably, at the K point, there are two Dirac states labeled as D<sub>1</sub> (1.7 eV above the Fermi level) and D<sub>2</sub> (1.4 eV below the Fermi level). Furthermore, the group velocities at D<sub>1</sub> ( $2.75 \times 10^5$  m/s) and D<sub>2</sub> ( $1.31 \times 10^5$  m/s) are only one order of magnitude lower than the Fermi velocity in graphene,<sup>1</sup> suggesting that *h*-B<sub>12</sub> is likely to exhibit high electrical conductivity. Additionally, *h*-B<sub>12</sub> exhibits a stronger spin-orbit coupling (SOC) effect compared to graphene and silicon, with a Rashba coefficient of approximately  $1.8$  eV/Å, which is greater than or at least comparable to that of many well-known strong SOC materials.<sup>2-6</sup> The aforementioned results can also be found in Fig. 2 of Ref. 32 in the manuscript. This work presents the thermal

transport properties of  $h$ -B<sub>12</sub>, using first-principles calculations in conjunction with the Boltzmann Transport Equation (BTE) method.

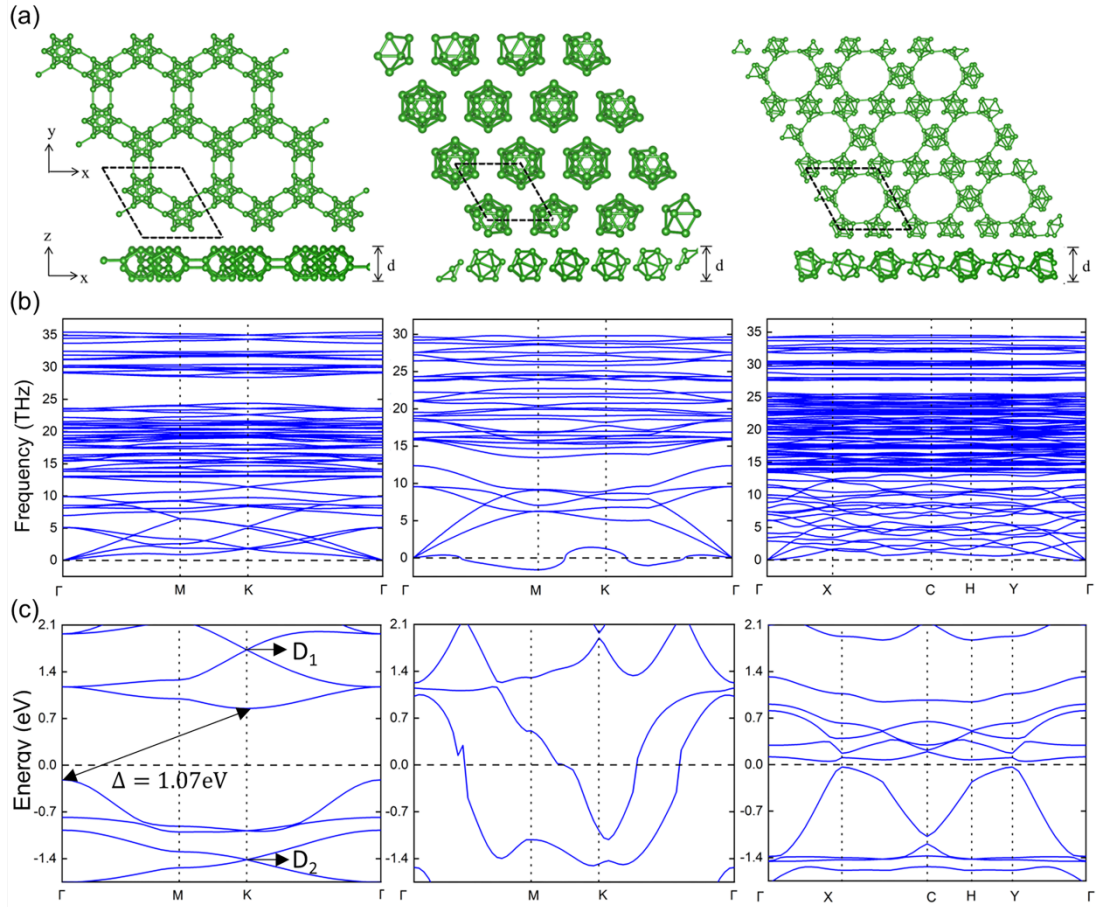

**Fig. S2** (a) Top and side views of 2D  $h$ -B<sub>12</sub> (left),  $t$ -B<sub>12</sub> (middle), and  $k$ -B<sub>12</sub> (right), with  $d$  representing the atomic layer thickness, the black rhombic dashed box indicates the unit cell. (b) Phonon dispersions of 2D  $h$ -B<sub>12</sub> (left),  $t$ -B<sub>12</sub> (middle), and  $k$ -B<sub>12</sub> (right). (c) Band structures of 2D  $h$ -B<sub>12</sub> (left),  $t$ -B<sub>12</sub> (middle), and  $k$ -B<sub>12</sub> (right), referenced to the Fermi energy. In the band structure of  $h$ -B<sub>12</sub>, two Dirac states are marked as  $D_1$  (1.7 eV above the Fermi level) and  $D_2$  (1.4 eV below the Fermi level).

**Table S1.** The parameters of the three structures in Fig. S2(a).

| Structure            | Space group  | $a$ (Å) <sup>a)</sup> | $b$ (Å) <sup>a)</sup> | $d$ (Å) <sup>a)</sup> | B-B (Å) <sup>a)</sup> |
|----------------------|--------------|-----------------------|-----------------------|-----------------------|-----------------------|
| $h$ -B <sub>12</sub> | $\bar{P}31m$ | 8.28                  | 8.28                  | 2.45                  | 1.71                  |
| $t$ -B <sub>12</sub> | $\bar{P}3m1$ | 4.78                  | 4.78                  | 2.46                  | 1.93                  |
| $k$ -B <sub>12</sub> | $C2/m$       | 9.49                  | 9.20                  | 3.00                  | 1.69                  |

<sup>a)</sup> " $a$ " and " $b$ " represent the lattice constants, " $d$ " is the thickness of the atomic layer, and "B-B" refers to the bond length of B-B bonds connecting adjacent clusters.

### S3. Three types of bonds in $h$ -B<sub>12</sub>.

The unit cell of  $h$ -B<sub>12</sub> contains two mirror-symmetric B<sub>12</sub> clusters. Each B<sub>12</sub> cluster in this structure is connected to three adjacent B<sub>12</sub> clusters through two B–B bonds, with a bond length of 1.71 Å, which is in the range of B–B  $\sigma$  bonds. Within each B<sub>12</sub> cluster, six weak covalent bonds persist in the  $xy$  plane, with an average B–B bond length of 1.90 Å. Notably, the top/bottom-most B-triangle features a bond length of 1.60 Å.

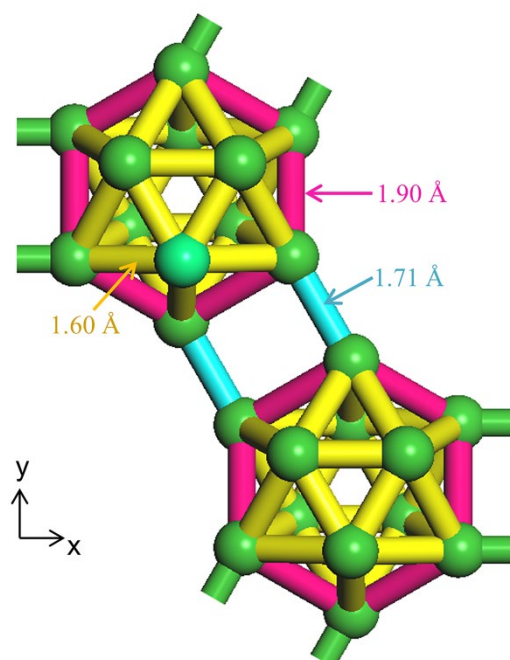

**Fig. S3** Blue represents the bonds connecting each B<sub>12</sub> cluster; pink indicates the six weak covalent bonds within the  $xy$  plane inside the B<sub>12</sub> cluster; and yellow denotes the B–B bonds formed by the top/bottom B triangles within the B<sub>12</sub> cluster.

## References

- <sup>1</sup> J. R. F. Lima, Phys. Lett. A 2015, **379**, 1372.
- <sup>2</sup> Q. Liu, Y. Guo, and A. J. Freeman, Nano Lett. 2013, **13**, 5264.
- <sup>3</sup> S. Singh and A. H. Romero, Phys. Rev. B 2017, **95**, 165444.
- <sup>4</sup> F.-X. Xiang, X.-L. Wang, M. Veldhorst, S.-X. Dou, and M. S. Fuhrer, Phys. Rev. B 2015, **92**, 035123.
- <sup>5</sup> L. G. D. da Silveira, P. Barone, and S. Picozzi, Phys. Rev. B 2016, **93**, 245159.
- <sup>6</sup> A. Narayan, Phys. Rev. B 2015, **92**, 220101.
